# Supplementary figures and images for: Accuracy Assessment of the GlucoMen® Day CGM System in Individuals with Type 1 Diabetes: A Pilot Study
Source: Preprints.org preprint supplement (doi:10.20944/preprints202111.0217.v1), 2021-11-12

**Supplementary Materials:**


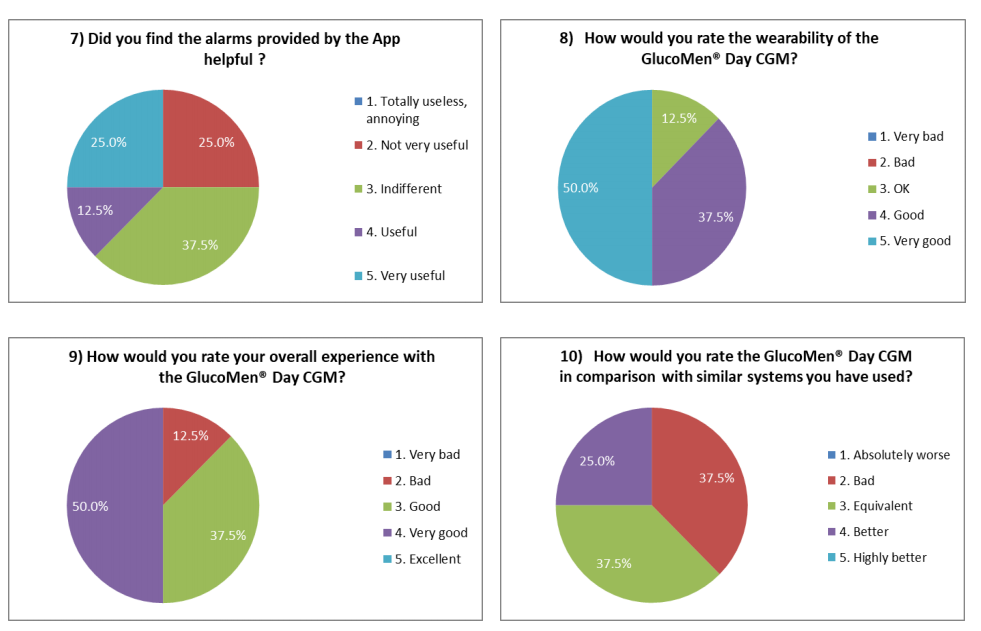

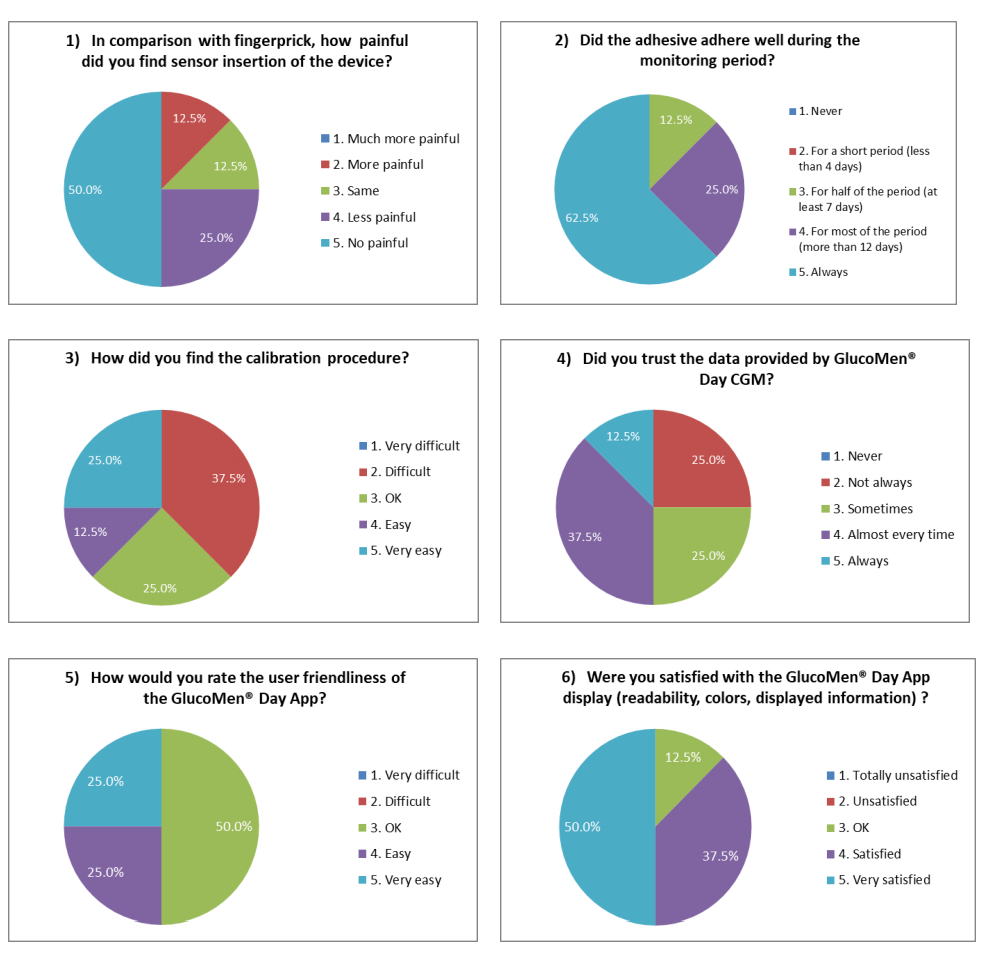


Figure S1: Usability Questionnaire Results (N = 8)

Supplement: Supplementary file 1 [file supplementary]
